# Supplementary material
Source: HighWire-hosted journal article supplement (https://www.rcpjournals.org/highwire/filestream/7172/field_highwire_adjunct_files/0/Bhat_S1.pdf)
Supplement: Bhat_S1.pdf [file Bhat_S1.pdf]

# Emergency Department Sepsis Screening and Action Tool

NAME: \_\_\_\_\_  
 DOB: \_\_\_\_\_  
 Hosp Number: \_\_\_\_\_

Date: \_\_\_\_\_

**Chemotherapy within last 4 weeks? → Follow suspected neutropenic sepsis protocol**

**Step 1: Any 2 of the following present?**

|                                 |                              |                             |
|---------------------------------|------------------------------|-----------------------------|
| Temp >38.3 or <36               | Yes <input type="checkbox"/> | No <input type="checkbox"/> |
| RR > 20                         | Yes <input type="checkbox"/> | No <input type="checkbox"/> |
| HR > 90                         | Yes <input type="checkbox"/> | No <input type="checkbox"/> |
| Acute confusion/reduced GCS     | Yes <input type="checkbox"/> | No <input type="checkbox"/> |
| Glucose > 7.7 (unless diabetic) | Yes <input type="checkbox"/> | No <input type="checkbox"/> |

No → Sepsis NOT present  
 Screening complete

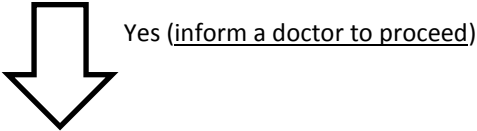

**Step 2: Could this be infection?**

|                                              |                                          |
|----------------------------------------------|------------------------------------------|
| <input type="checkbox"/> Pneumonia           | <input type="checkbox"/> UTI             |
| <input type="checkbox"/> Abdominal infection | <input type="checkbox"/> Cellulitis      |
| <input type="checkbox"/> Septic arthritis    | <input type="checkbox"/> Wound infection |
| <input type="checkbox"/> Other _____         | <input type="checkbox"/> Unknown         |

No → Sepsis NOT present  
 Treat other possible pathology

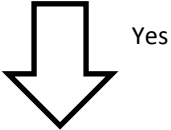

**Step 3: ANY red flags?**

|                                          |                              |                             |
|------------------------------------------|------------------------------|-----------------------------|
| Systolic B.P <90 or MAP < 65             | Yes <input type="checkbox"/> | No <input type="checkbox"/> |
| Lactate > 2                              | Yes <input type="checkbox"/> | No <input type="checkbox"/> |
| HR >130                                  | Yes <input type="checkbox"/> | No <input type="checkbox"/> |
| RR > 25                                  | Yes <input type="checkbox"/> | No <input type="checkbox"/> |
| Sats < 91%                               | Yes <input type="checkbox"/> | No <input type="checkbox"/> |
| Responds to voice or pain / unresponsive | Yes <input type="checkbox"/> | No <input type="checkbox"/> |
| Purpuric rash                            | Yes <input type="checkbox"/> | No <input type="checkbox"/> |

No → Uncomplicated sepsis  
 present now

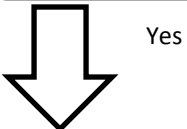

**Step 4: Red flag sepsis actions (complete ASAP)**

|                                              |                          |
|----------------------------------------------|--------------------------|
| High-flow oxygen                             | <input type="checkbox"/> |
| Blood cultures time: _____:_____             | <input type="checkbox"/> |
| IV ABX (see trust antibiotic policy)         | <input type="checkbox"/> |
| IV fluids (Incremental crystalloids boluses) | <input type="checkbox"/> |
| VBG/ABG                                      | <input type="checkbox"/> |
| Urine catheter and urine output monitoring   | <input type="checkbox"/> |
| Priority one and inform doctor in charge     | <input type="checkbox"/> |

**Uncomplicated sepsis action**

|                                                 |                          |
|-------------------------------------------------|--------------------------|
| Inform a doctor and treat to standard protocols | <input type="checkbox"/> |
| Hourly obs                                      | <input type="checkbox"/> |
| FBC U+E LFTs CRP COAG cultures                  | <input type="checkbox"/> |
| Monitor urine output                            | <input type="checkbox"/> |
| Reassess for severe sepsis hourly*              | <input type="checkbox"/> |
| Treat as red flag sepsis if any of:             | <input type="checkbox"/> |
| * Plats<100 Creat>177 INR>1.5 Bil>34            |                          |

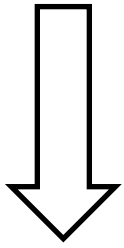

(Turn over for ongoing management)

Name of nurse carrying out assessment: \_\_\_\_\_  
 Name of Dr Informed: \_\_\_\_\_  
 Time of arrival: \_\_\_\_\_:\_\_\_\_\_  
 Time of Abx administration: \_\_\_\_\_:\_\_\_\_\_

Sign: \_\_\_\_\_ Time: \_\_\_\_\_  
 Sign: \_\_\_\_\_ Time: \_\_\_\_\_

## Ongoing management for red flag sepsis / severe sepsis:

- Complete clinical assessment
- Move to the resuscitation area + continuous monitoring
- Involve senior ED doctor (middle grade or a consultant) and document action plan including appropriateness for escalation to HDU/ITU:      Name of senior doctor involved: \_\_\_\_\_ Time \_\_\_\_\_  
Patient for escalation    Y/N    document details in notes
- Is critical care referral required? (see criteria below)
- Documented observations every 15–30 mins including EDOD
- Continue fluid resuscitation as required (lactate > 2 or Sys BP <90) up to 30 mls/kg (crystalloids)
- Aim to achieve source control if cause of sepsis is amenable to drainage or removal
- Repeat VBG/ABG within 1 hour
- Perform CXR and urinalysis
- If lactate >2 on VBG → perform ABG to confirm lactate results
- Surgical referral if abdominal sepsis suspected
- Refer to appropriate admitting team
- Joint patient care by the ED and admitting team while in the ED

## Consider critical care referral if any of the following present:

- Airway obstruction
- RR >30
- Sats < 95% on high flow oxygen
- PO<sub>2</sub> < 0 on high flow oxygen
- Worsening bilateral crepitations
- pH < 7.3
- BE lower than -8
- Lactate > 4 despite fluid resuscitation
- UO < 15 mls/hour despite fluid resuscitation
- Creatinine >300
- Persisted K>6 despite medical treatment
- GCS <13
- Seizures
- Worsening physiological parameters despite initial resuscitation (BP, HR, Sats, RR, pH/BE, lactate, UO, GCS)
